# Supplementary material for: Point-by-Point Pulsed Field Ablation Using a Multimodality Generator and a Contact Force–Sensing Ablation Catheter: Comparison With Radiofrequency Ablation in a Remapped Chronic Swine Heart
Source: PubMed Central journal article supplement (PMC10734778; doi:10.1161/circep.123.012344), 2022-11-23
Supplement: hae-16-663-s001.pdf [file hae-16-663-s001.pdf]

SUPPLEMENTAL MATERIAL

Supplemental Figure I

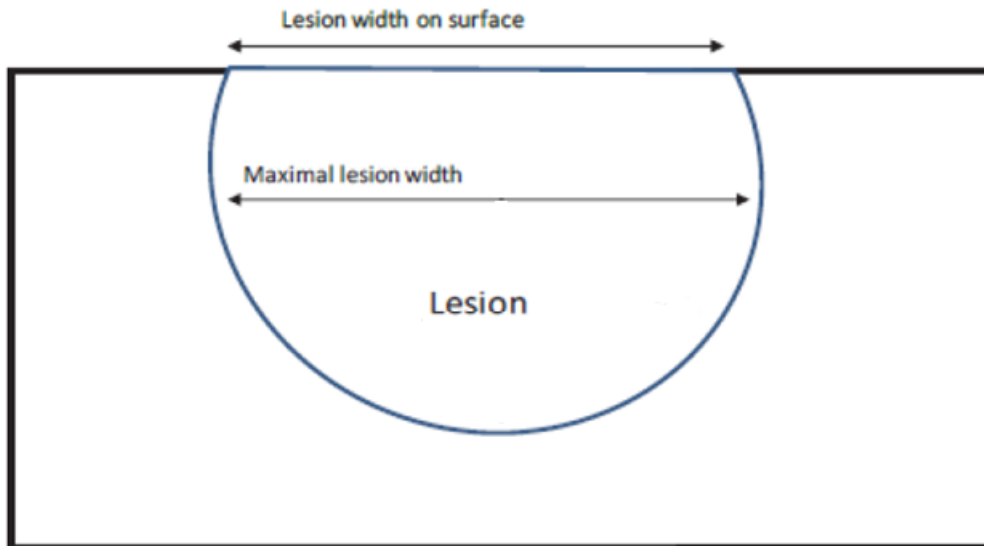

**Supplemental Figure I Legend.**

**Schematical representation of the evaluated lesion metrics.** After  $28 \pm 2$  days post ablation, lesion metrics – endocardial and mid-myocardial lesion width – were evaluated at each investigated site on gross necroscopy and histology.
